# Supplementary material
Source: PubMed Central journal article supplement (PMC5571354)
Supplement: AAC.00931-17_zac009176508s1.pdf [file AAC.00931-17_zac009176508s1.pdf]

1  
2  
3

### Supplementary material

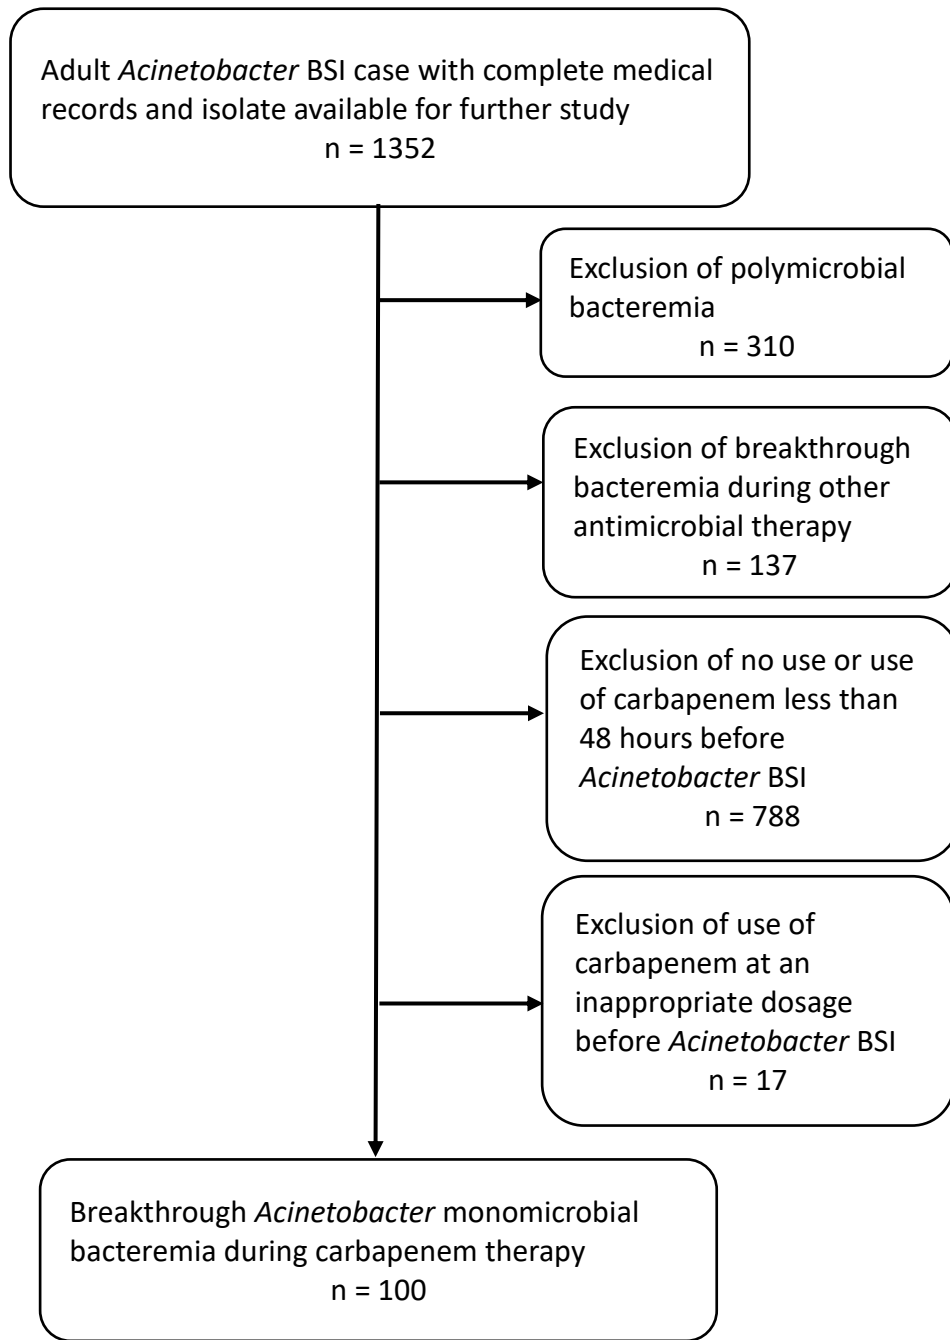

**FIG S1** Methodology for application of exclusion criteria. Abbreviation: BSI, bloodstream Infection.

4 **TABLE S1** Logistic regression analysis of 14-day mortality risk factor of carbapenem-resistant *Acinetobacter* bacteremia

| Variables                             | No. (%) of cases or median value (IQR) <sup>a</sup> |                   |                   | Univariate analysis |          | Multivariate analysis |          |
|---------------------------------------|-----------------------------------------------------|-------------------|-------------------|---------------------|----------|-----------------------|----------|
|                                       | All                                                 | Survived          | Non-survived      | OR (95% CI)         | <i>P</i> | OR (95% CI)           | <i>P</i> |
|                                       | ( <i>n</i> = 352)                                   | ( <i>n</i> = 208) | ( <i>n</i> = 144) |                     |          |                       |          |
| Breakthrough bacteremia               | 87 (24.7)                                           | 42 (20.2)         | 45 (31.3)         | 1.797 (1.102-2.929) | 0.019    | 1.794 (1.032-3.118)   | 0.038    |
| APACHE II score                       | 24 (18-30)                                          | 22 (16-27)        | 28 (21-35)        | 1.091 (1.062-1.121) | < 0.001  | 1.076 (1.046-1.107)   | < 0.001  |
| Thoracic drain                        | 28 (8.0)                                            | 11 (5.3)          | 17 (11.8)         | 2.397 (1.087-5.285) | 0.030    | 3.056 (1.255-7.444)   | 0.014    |
| Shock                                 | 118 (33.5)                                          | 48 (23.1)         | 70 (48.6)         | 3.153 (1.992-4.991) | < 0.001  | 2.313 (1.390-3.848)   | 0.001    |
| Bacteremia due to <i>A. baumannii</i> | 236 (67.0)                                          | 122 (58.7)        | 114 (79.2)        | 2.679 (1.645-4.363) | < 0.001  | 3.036 (1.739-5.299)   | < 0.001  |

5 IQR, interquartile range; OR, odds ratio; CI, confidence interval.

6 <sup>a</sup>Data are number of cases (%) for categorical variables and median value (interquartile range) for continuous variables.

7

8 **TABLE S2** Antimicrobial regimens for treatment of carbapenem-resistant *Acinetobacter* bacteremia

| Main agents used <sup>a,b</sup>           | No. (%) of patients<br>( <i>n</i> = 352) | APACHE II score, median<br>(IQR) <sup>c</sup> | No. (%) of patients |                      |                |                      |                |
|-------------------------------------------|------------------------------------------|-----------------------------------------------|---------------------|----------------------|----------------|----------------------|----------------|
|                                           |                                          |                                               | Appropriate therapy | 14-day non-survivors | <i>P</i> value | 30-day non-survivors | <i>P</i> value |
| Continued carbapenem monotherapy          | 73 (20.7)                                | 27 (21–33.5)                                  | 0 (0.0)             | 29 (39.7)            | 0.923          | 39 (53.4)            | 1.000          |
| Colistin-based therapy                    | 62 (17.6)                                | 23.5 (16.75–28)                               | 61 (98.4)           | 26 (41.9)            | 0.969          | 35 (56.5)            | 0.626          |
| Tigecycline-based therapy                 | 47 (13.4)                                | 24 (17–28)                                    | 27 (57.4)           | 23 (48.9)            | 0.297          | 25 (53.2)            | 1.000          |
| Fluoroquinolone-based therapy             | 32 (9.1)                                 | 22 (17–32)                                    | 16 (50.0)           | 16 (50.0)            | 0.364          | 20 (62.5)            | 0.336          |
| Sulbactam-based therapy                   | 14 (4.0)                                 | 22 (16–28)                                    | 6 (42.9)            | 3 (21.4)             | 0.217          | 5 (35.7)             | 0.300          |
| Carbapenem + colistin-based therapy       | 29 (8.2)                                 | 26 (18–28.5)                                  | 27 (93.1)           | 13 (44.8)            | 0.802          | 16 (55.2)            | 0.945          |
| Carbapenem + tigecycline-based therapy    | 13 (3.7)                                 | 28 (19–30)                                    | 8 (61.5)            | 8 (61.5)             | 0.210          | 8 (61.5)             | 0.721          |
| Carbapenem + sulbactam-based therapy      | 6 (1.7)                                  | 27 (21–32.75)                                 | 3 (50.0)            | 3 (50.0)             | 0.692          | 3 (50.0)             | 1.000          |
| Colistin + tigecycline-based therapy      | 16 (4.5)                                 | 18.5 (12–26.25)                               | 16 (100.0)          | 7 (43.8)             | 1.000          | 8 (50.0)             | 1.000          |
| Carbapenem + colistin + tigecycline-based | 3 (0.9)                                  | 11, 21, 28                                    | 3 (100.0)           | 2 (66.7)             | 0.748          | 2 (66.7)             | 1.000          |

---

therapy

---

9 <sup>a</sup>An antimicrobial agent (or antimicrobial agents)-based therapy denotes the corresponding antimicrobial agent(s) alone or in combination with  
10 other antimicrobial agent(s).

11 <sup>b</sup>“Colistin” denotes intravenous colistin only. Inhaled colistin is not included.

12 <sup>c</sup>IQR, interquartile range. When the case number is less than 4, APACHE II score of each case is shown.

13

14 **TABLE S3** Antimicrobial regimens for treatment of breakthrough *Acinetobacter* bacteremia during carbapenem therapy

| Main agents used <sup>a,b</sup>                   | No. (%) of patients<br>( <i>n</i> = 100) | APACHE II score, median<br>(IQR) <sup>e</sup> | No. (%) of patients |                                  |                      |                |                      |                |
|---------------------------------------------------|------------------------------------------|-----------------------------------------------|---------------------|----------------------------------|----------------------|----------------|----------------------|----------------|
|                                                   |                                          |                                               | Appropriate therapy | Combination therapy <sup>f</sup> | 14-day non-survivors | <i>P</i> value | 30-day non-survivors | <i>P</i> value |
| Continued carbapenem monotherapy <sup>c</sup>     | 59 (59.0)                                | 25 (17–33)                                    | 11 (18.6)           | 0 (0.0)                          | 25 (42.4)            | 0.503          | 31 (52.5)            | 0.382          |
| Colistin-based therapy                            | 19 (19.0)                                | 26 (18–28)                                    | 19 (100)            | 19 (100.0)                       | 10 (52.6)            | 0.697          | 11 (57.9)            | 1.000          |
| Tigecycline-based therapy                         | 15 (15.0)                                | 26 (17–31)                                    | 13 (86.7)           | 11 (73.3)                        | 11 (73.3)            | 0.043          | 12 (80.0)            | 0.095          |
| Fluoroquinolone-based therapy                     | 9 (9.0)                                  | 29 (20–40)                                    | 8 (88.9)            | 8 (88.9)                         | 5 (55.6)             | 0.729          | 6 (66.7)             | 0.728          |
| Sulbactam-based therapy <sup>c</sup>              | 5 (5.0)                                  | 26 (22–29)                                    | 4 (80.0)            | 5 (100.0)                        | 1 (20.0)             | 0.370          | 2 (40.0)             | 0.649          |
| Carbapenem + colistin-based therapy               | 17 (17.0)                                | 26 (19–29)                                    | 17 (100)            | 17 (100.0)                       | 9 (52.9)             | 0.716          | 10 (58.8)            | 1.000          |
| Carbapenem + tigecycline-based therapy            | 9 (9.0)                                  | 28 (16–30)                                    | 7 (77.8)            | 9 (100.0)                        | 7 (77.8)             | 0.076          | 8 (88.9)             | 0.074          |
| Carbapenem + sulbactam-based therapy <sup>c</sup> | 5 (5.0)                                  | 26 (22–29)                                    | 4 (80.0)            | 5 (100.0)                        | 1 (20.0)             | 0.370          | 2 (40.0)             | 0.649          |
| Colistin <sup>c</sup> + tigecycline-based therapy | 4 (4.0)                                  | 16 (12–25.25)                                 | 4 (100.0)           | 4 (100.0)                        | 3 (75.0)             | 0.331          | 3 (75.0)             | 0.632          |

|                                                   |           |                   |            |            |           |       |           |       |
|---------------------------------------------------|-----------|-------------------|------------|------------|-----------|-------|-----------|-------|
| Carbapenem + colistin + tigecycline-based therapy | 2 (2.0)   | 11, 28            | 2 (100.0)  | 2 (100.0)  | 2 (100.0) | 0.209 | 2 (100.0) | 0.505 |
| Antimicrobial regimens <sup>d</sup>               |           |                   |            |            |           |       |           |       |
| Carbapenem + colistin                             | 12 (12.0) | 26 (20.25–28.75)  | 12 (100.0) | 12 (100.0) | 6 (50.0)  | 1.000 | 7 (58.3)  | 1.000 |
| Carbapenem + tigecycline                          | 5 (5.0)   | 29 (16–32)        | 3 (60.0)   | 5 (100.0)  | 3 (60.0)  | 0.659 | 4 (80.0)  | 0.387 |
| Carbapenem + sulbactam <sup>c</sup>               | 4 (4.0)   | 27 (26–29.5)      | 3 (75.0)   | 4 (100.0)  | 1 (25.0)  | 0.622 | 2 (50.0)  | 1.000 |
| Carbapenem + fluoroquinolone                      | 2 (2.0)   | 37, 42            | 2 (100.0)  | 2 (100.0)  | 0 (0.0)   | 0.498 | 1 (50.0)  | 1.000 |
| Carbapenem + tigecycline + colistin               | 2 (2.0)   | 11, 28            | 2 (100.0)  | 2 (100.0)  | 2 (100.0) | 0.209 | 2 (100.0) | 0.505 |
| Carbapenem + colistin + fluoroquinolone           | 2 (2.0)   | 29, 39            | 2 (100.0)  | 2 (100.0)  | 1 (50.0)  | 1.000 | 1 (50.0)  | 1.000 |
| Carbapenem + tigecycline + fluoroquinolone        | 2 (2.0)   | 21, 28            | 2 (100.0)  | 2 (100.0)  | 2 (100.0) | 0.209 | 2 (100.0) | 0.505 |
| Tigecycline only                                  | 4 (4.0)   | 28.5 (20.75–41.5) | 4 (100.0)  | 0 (0.0)    | 3 (75.0)  | 0.331 | 3 (75.0)  | 0.632 |
| Colistin + tigecycline                            | 2 (2.0)   | 15, 17            | 2 (100.0)  | 2 (100.0)  | 1 (50.0)  | 1.000 | 1 (50.0)  | 1.000 |

15 <sup>a</sup>An antimicrobial agent (or antimicrobial agents)-based therapy denotes the corresponding antimicrobial agent(s) alone or in combination with

16 other antimicrobial agent(s).

17 <sup>b</sup>“Colistin” denotes intravenous colistin only. Inhaled colistin is not included.

18 <sup>c</sup>One patient had received concomitant inhaled colistin therapy.

19 <sup>d</sup>Not in combination with other antimicrobial agents.

20 <sup>e</sup>IQR, interquartile range. When the case number is less than 4, APACHE II score of each case is shown.

21 <sup>f</sup>Combination therapy is defined as administration of more than one antimicrobial agent.
